# Supplementary material for: A dual antibacterial action of soft quaternary ammonium compounds: bacteriostatic effects, membrane integrity, and reduced in vitro and in vivo toxicity
Source: Royal Society of Chemistry journal article supplement (doi:10.1039/d4ra07975b), 2025-01-01
Supplement: d4ra07975b3.pdf [file d4ra07975b3.pdf]

## Supporting Information

**Table S1.** Phospholipid constituents of the model *Staphylococcus Aureus* (left column) together with their assigned 4-letter codes (right column).<sup>1</sup>

| Lipids            | Lipid code |
|-------------------|------------|
| PG (a15:0/a15:0)  | FFPG       |
| PG (i15:0/a15:0)  | IFPG       |
| PG ( 16:0/a15:0)  | PFPG       |
| PG (i17:0/a15:0)  | JFPG       |
| PG (a17:0/a15:0)  | ZFPG       |
| PG (i17:0/i15:0)  | JIPG       |
| PG (a17:0/i15:0)  | ZIPG       |
| PG ( 18:0/a15:0)  | SFPG       |
| PG (i19:0/a15:0)  | VFPG       |
| PG (a19:0/a15:0)  | TFPG       |
| PG (a19:0/i15:0)  | TIPG       |
| PG ( 20:0/a15:0)  | XFPG       |
| PG ( 18:1/i15:0)  | OIPG       |
| PG ( 18:1/a15:0)  | OFPG       |
| LPG (i17:0/a15:0) | JFGK       |
| LPG (a17:0/a15:0) | ZFGK       |
| LPG ( 18:0/a15:0) | SFGK       |
| LPG (a19:0/a15:0) | TFGK       |
| CL (a17:0/a15:0)  | ZFCL       |

**Table S2.** Letter Codes representing Fatty Acyl Tails which are not present in CHARMM-GUI Membrane Builder module.<sup>1</sup>

| Lipid tail | Code | Explanation                                                      |
|------------|------|------------------------------------------------------------------|
| a15:0      | F    | anteisopentadecanoyl, <b>F</b> ifteen for pentadecane            |
| i15:0      | I    | <b>I</b> sopentadecanoyl                                         |
| a17:0      | Z    | anteisomargaroyl, <b>Z</b> for g                                 |
| i17:0      | J    | isomargaroyl, <b>J</b> for g                                     |
| a19:0      | T    | an <b>T</b> eisononadecanoyl                                     |
| i19:0      | V    | isononadecanoyl, <b>V</b> is after T and resembles an iso branch |
| 20:0       | X    | arachidoyl, <b>X</b> for ch                                      |

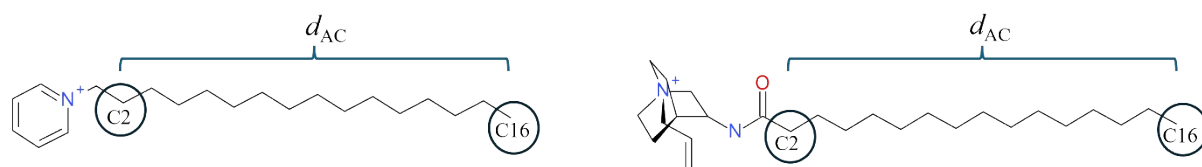

**Figure S1.** CPC (left) and QC<sub>16</sub>-Allyl molecules. Atoms used to define the distance  $d_{AC}$  (distance between the C2 and C16 atoms in the aliphatic chain) are denoted with the blue ellipses.

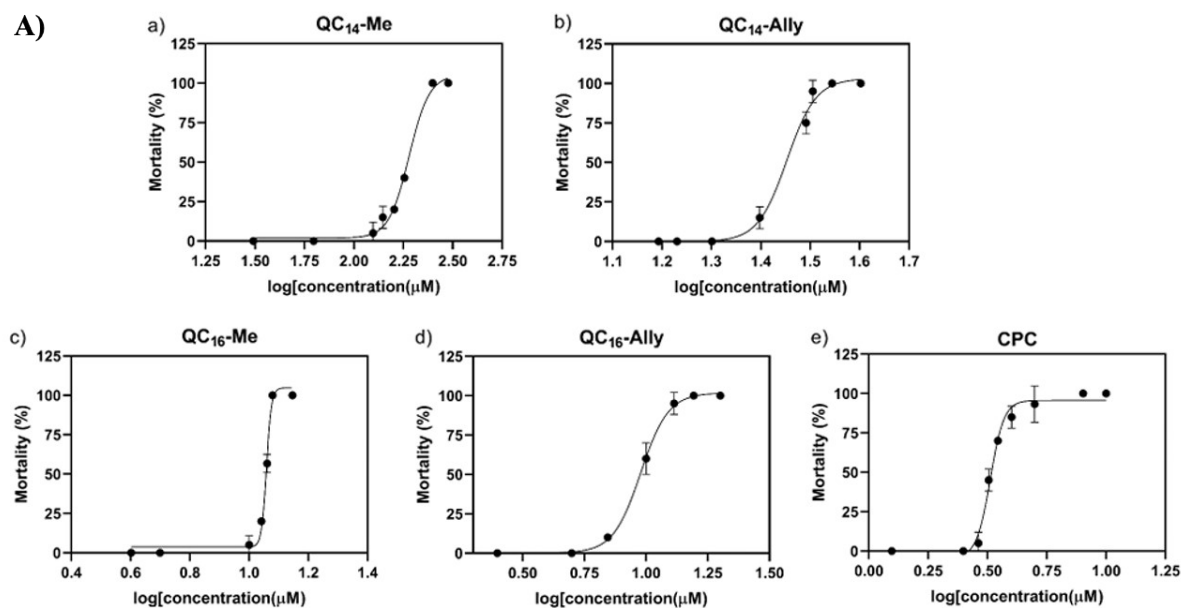

**B)**

| Sample                  | LC <sub>50</sub> , μM | Confidence interval, CI (95%) | Hill Slope |
|-------------------------|-----------------------|-------------------------------|------------|
| QC <sub>14</sub> -Me    | 190.1                 | 183.0-200.1                   | 8.481      |
| QC <sub>14</sub> -Allyl | 28.37                 | 27.46-29.30                   | 14.75      |
| QC <sub>16</sub> -Me    | 11.45                 | 11.38-11.52                   | 51.81      |
| QC <sub>16</sub> -Allyl | 9.516                 | 9.082-9.895                   | 7.756      |
| CPC                     | 3.250                 | 3.150-3.360                   | 14.97      |

**Figure S2. A)** Concentration-response curves used for the calculation of the *Danio rerio* mortality after 120 hours of exposure to: a) QC<sub>14</sub>-Me, b) QC<sub>14</sub>-Allyl, c) QC<sub>16</sub>-Me, d) QC<sub>16</sub>-Allyl and e) CPC. **B)** Dose-inhibition results obtained after 120 hours of *Danio rerio* exposure to tested samples.
